# Supplementary material
Source: PubMed Central journal article supplement (PMC4566276)
Supplement: 10.1534_115.178525_genetics.115.178525-1.pdf [file 10.1534_115.178525_genetics.115.178525-1.pdf]

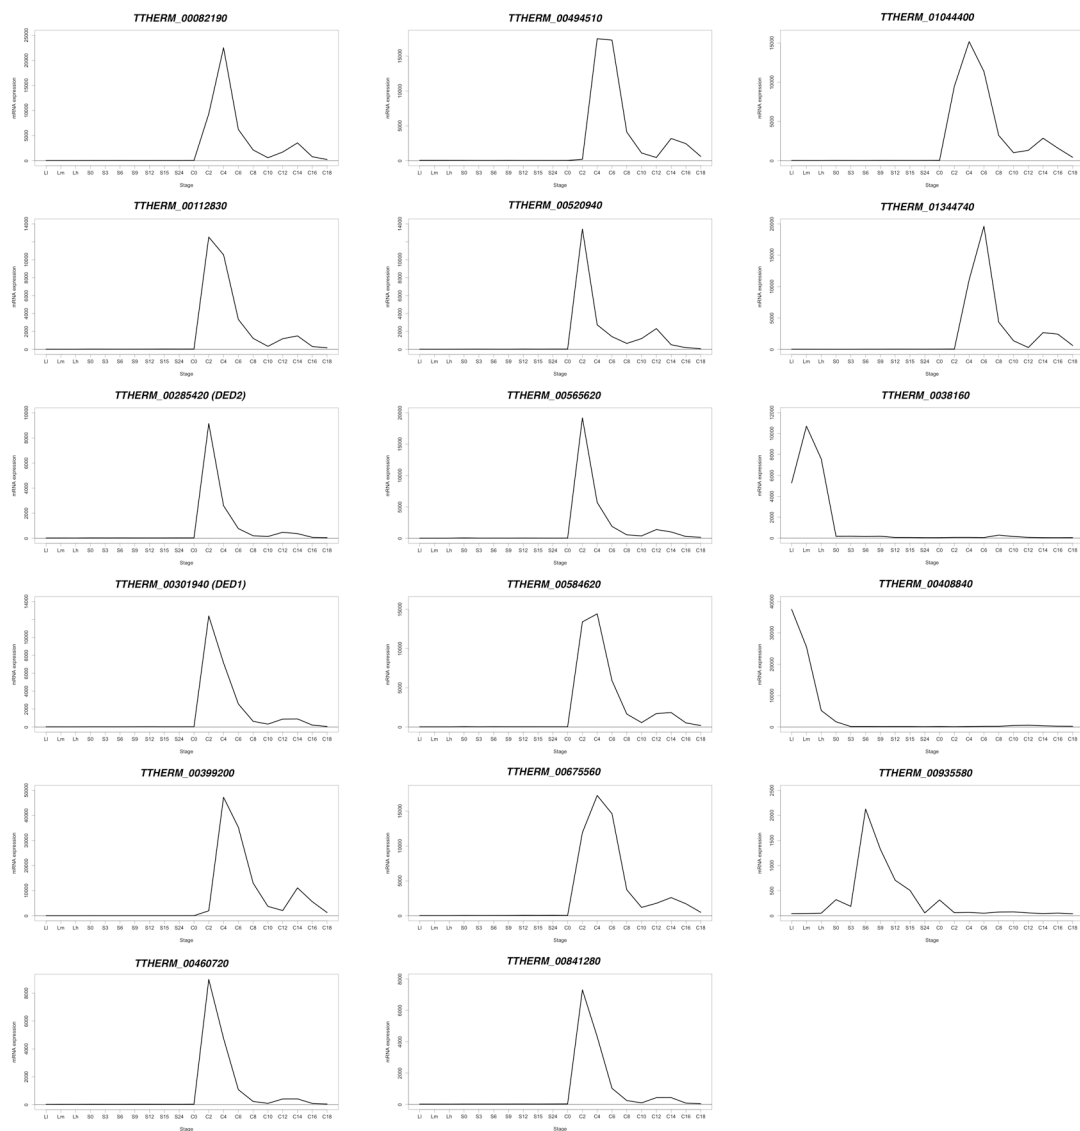

Figure S1. Gene expression profiles of target genes

The expression levels of mRNAs analyzed by microarray hybridization at different stages of the life cycle (Miao et al. 2009) are plotted. Growing cells at three different concentrations:  $\sim 1 \times 10^5$  cells/mL,  $\sim 3.5 \times 10^5$  cells/mL and  $\sim 1 \times 10^6$  cells/mL (Ll, Lm, and Lh, respectively); cells starved for 0, 3, 6, 9, 12, 15 and 24 hrs (S0, S3, S6, S9, S12, S15 and S24, respectively); and conjugating cells at 2, 4, 6, 8, 10 and 12 hrs post-mixing (C2, C4, C6, C8, C10 and C12, respectively) are indicated. The data were obtained from the Tetrahymena Functional Genomics Database (<http://tfgd.ihb.ac.cn/>).

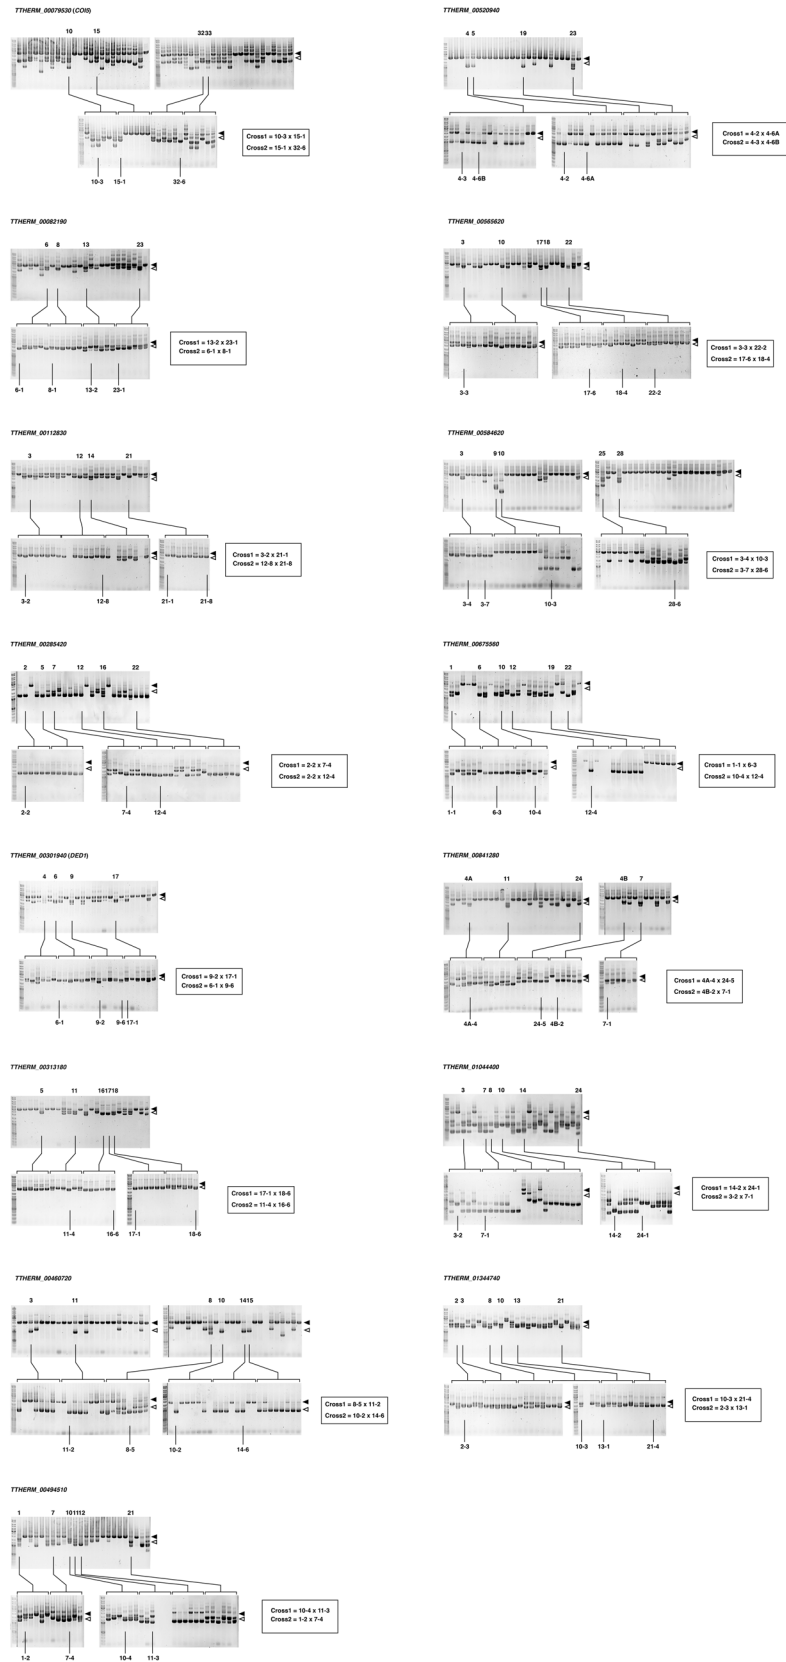

Figure S2. Establishment of KO strains by coDel

Establishment of KO strains by coDel. Progeny lines with nearly complete deletion at the indicated gene loci by coDel (top) were cultured for 12 passages to allow random assortment of the loci and sexual maturation. Then, 6-8 clonal cell lines were established from each progeny and analyzed by genomic PCR (bottom). Indicated cells lines were chosen and used for a DNA elimination assay.

**Table S1. The genomic locations of the codel targets and the names of the primers used for target amplification and for genomic PCR checking codel**

| Target gene            | Corresponding Figs/Tables | MAC genomic position of target<br>MAC SCh | start   | end     | Primer 1<br>Primer set used for target amplification | Primer 2     | Primer 1<br>Primer set used for deletion check | Primer 2                     |
|------------------------|---------------------------|-------------------------------------------|---------|---------|------------------------------------------------------|--------------|------------------------------------------------|------------------------------|
| TTHERM_00079530 (CO15) | Fig. 1; Table 1           | 3828                                      | 1004795 | 1005509 | cDeISa1_FW                                           | cDeISa1_RV   | TTHERM_00079530_DelCheck_FW                    | TTHERM_00079530_DelCheck_RV  |
| TTHERM_00082190        | Fig. 1; Table 1           | 3836                                      | 1201352 | 1201965 | cDeISa3_FW                                           | cDeISa3_RV   | TTHERM_00082190_DelCheck_FW                    | TTHERM_00082190_DelCheck_RV  |
| TTHERM_00112830        | Fig. 1; Table 1           | 3812                                      | 682512  | 683218  | cDeISa4_FW                                           | cDeISa4_RV   | TTHERM_00112830_DelCheck_FW                    | TTHERM_00112830_DelCheck_RV  |
| TTHERM_00285420 (DE02) | Fig. 1, 3; Table 1        | 3688                                      | 58874   | 59545   | cDeISa17_FW                                          | cDeISa17_RV  | TTHERM_00285420_DelCheck_FW                    | TTHERM_00285420_DelCheck_RV  |
| TTHERM_00285420 (DE02) | Fig. 3                    | 3688                                      | 58525   | 59196   | cDeISa17_FW5                                         | cDeISa17_RV2 | TTHERM_00285420_DelCheck_FW                    | TTHERM_00285420_DelCheck_RV2 |
| TTHERM_00285420 (DE02) | Fig. 3                    | 3688                                      | 58525   | 59545   | cDeISa17_FW                                          | cDeISa17_RV2 | TTHERM_00285420_DelCheck_FW                    | TTHERM_00285420_DelCheck_RV2 |
| TTHERM_00285420 (DE02) | Fig. 3                    | 3688                                      | 58067   | 59545   | cDeISa17_FW                                          | cDeISa17_RV3 | TTHERM_00285420_DelCheck_FW                    | TTHERM_00285420_DelCheck_RV3 |
| TTHERM_00285420 (DE02) | Fig. 3                    | 3688                                      | 57524   | 59545   | cDeISa17_FW                                          | cDeISa17_RV4 | TTHERM_00285420_DelCheck_FW                    | TTHERM_00285420_DelCheck_RV4 |
| TTHERM_00301940 (DED1) | Fig. 1, 2, 6; Table 1     | 3691                                      | 710271  | 710862  | cDeISa2_FW                                           | cDeISa2_RV   | TTHERM_00301940_DelCheck_FW                    | TTHERM_00301940_DelCheck_RV  |
| TTHERM_00399200        | Fig. 1; Table 1           | 3713                                      | 73945   | 74523   | cDeISa7_FW                                           | cDeISa7_RV   | TTHERM_00399200_DelCheck_FW                    | TTHERM_00399200_DelCheck_RV  |
| TTHERM_00313180        | Fig. 1; Table 1           | 3810                                      | 469974  | 470526  | cDeISa19_FW                                          | cDeISa19_RV  | TTHERM_00313180_DelCheck_FW                    | TTHERM_00313180_DelCheck_RV  |
| TTHERM_00460720        | Fig. 1; Table 1           | 3823                                      | 98721   | 99339   | cDeISa15_FW                                          | cDeISa15_RV  | TTHERM_00460720_DelCheck_FW1                   | TTHERM_00460720_DelCheck_RV  |
| TTHERM_00460720        | Table 1                   | 3823                                      | 98677   | 99568   | cDeISa15_FW                                          | cDeISa15_RV2 | TTHERM_00460720_DelCheck_FW2                   | TTHERM_00460720_DelCheck_RV  |
| TTHERM_00494510        | Fig. 1; Table 1           | 3711                                      | 398243  | 398863  | cDeISa12_FW                                          | cDeISa12_RV  | TTHERM_00494510_DelCheck_FW                    | TTHERM_00494510_DelCheck_RV  |
| TTHERM_00520940        | Fig. 1; Table 1           | 3717                                      | 18388   | 18869   | cDeISa13_FW                                          | cDeISa13_RV  | TTHERM_00520940_DelCheck_FW                    | TTHERM_00520940_DelCheck_RV  |
| TTHERM_00565620        | Fig. 1; Table 1           | 3721                                      | 288798  | 289473  | cDeISa6_FW                                           | cDeISa6_RV   | TTHERM_00565620_DelCheck_FW                    | TTHERM_00565620_DelCheck_RV  |
| TTHERM_00584620        | Fig. 1; Table 1           | 3675                                      | 48731   | 49313   | cDeISa5_FW                                           | cDeISa5_RV   | Sa5_DelCheck_FW                                | Sa5_DelCheck_RV              |
| TTHERM_00675560        | Fig. 1                    | 101                                       | 212542  | 213240  | cDeISa16_FW                                          | cDeISa16_RV  | TTHERM_00675560_DelCheck_FW                    | TTHERM_00675560_DelCheck_RV1 |
| TTHERM_00675560        | Table 1                   | 101                                       | 212542  | 213580  | cDeISa16_FW                                          | cDeISa16_RV2 | TTHERM_00675560_DelCheck_FW                    | Sa16_DelCheck_RV2            |
| TTHERM_00841280        | Fig. 1; Table 1           | 3741                                      | 38458   | 39065   | cDeISa18_FW                                          | cDeISa18_RV  | Sa18_DelCheck_FW                               | Sa18_DelCheck_RV             |
| TTHERM_01044400        | Fig. 1; Table 1           | 3760                                      | 14886   | 15592   | cDeISa11_FW                                          | cDeISa11_RV  | TTHERM_01044400_DelCheck_FW                    | TTHERM_01044400_DelCheck_RV1 |
| TTHERM_01344740        | Fig. 1; Table 1           | 336                                       | 36510   | 37116   | cDeISa10_FW                                          | cDeISa10_RV  | TTHERM_01344740_DelCheck_FW                    | TTHERM_01344740_DelCheck_RV  |
| TTHERM_00388160        | Fig. 1; Table 1           | 41                                        | 199509  | 200155  | Log1_cDeIFW                                          | Log1_cDeIRV  | Log1_DelCheckFW                                | Log1_DelCheckRV              |
| TTHERM_00408840        | Fig. 1; Table 1           | 3714                                      | 89022   | 89690   | Log2_cDeIFW                                          | Log2_cDeIRV  | Log2_DelCheckFW                                | Log2_DelCheckRV              |
| TTHERM_00935580        | Fig. 1; Table 1           | 169                                       | 58015   | 58654   | Sv1_cDeIFW                                           | Sv1_cDeIRV   | Sv1_DelCheckFW                                 | Sv1_DelCheckRV               |
| TW12                   | Fig. 4                    | scf_8254654                               | 64114   | 65135   | TW12_cDeIFW                                          | TW12_cDeIRV  | TW12_DelCheckFW2                               | TW12_DelCheckRV2             |
| TW12                   | Fig. 4                    | scf_8254654                               | 64114   | 65135   | TW12_cDeIFW                                          | TW12_cDeIRV  | TW16_DelCheckFW                                | TW16_DelCheckRV              |
| TW12                   | Fig. 4                    | scf_8254654                               | 64114   | 65135   | TW12_cDeIFW                                          | TW12_cDeIRV  | TW17_DelCheckFW2                               | TW17_DelCheckRV2             |
| XRN2                   | Fig. 5                    | 3702                                      | 598484  | 599481  | XRN2_cDeIFW                                          | XRN2_cDeIRV  | XRN2_DelCheck_FW                               | XRN2_DelCheck_RV             |
| XRN4                   | Fig. 5                    | 3813                                      | 329272  | 330354  | XRN4_cDeIFW_XRN2c                                    | XRN4_cDeIRV  | XRN4_DelCheck_FW                               | XRN4_DelCheck_RV             |

**Table S2. The sequences of the primers used in this study**

| target                       | primer name                  | sequence (5' to 3')                                             |
|------------------------------|------------------------------|-----------------------------------------------------------------|
| TTHERM_00079530 (COI5)       | cDelSa1_FW                   | <u>CTTTATTGTTATCATCTTATGACCGCTGTT</u> CAGCTCTAATTACTCG          |
|                              | cDelSa1_RV                   | <u>CTCATCAAGTTGTAATGCTAAAATGCTAAT</u> CATTACCATTCTTCTACAGGC     |
|                              | TTHERM_00079530_DelCheck_FW  | ATGAACGATAGTAAACAGCTACTCAC                                      |
|                              | TTHERM_00079530_DelCheck_RV  | AGCTTGATGAGCAATTCACGACAG                                        |
| TTHERM_00082190              | cDelSa3_FW                   | <u>CTTTATTGTTATCATCTTATGACCGCTTGT</u> ATGGTCTGTCCATCCCTC        |
|                              | cDelSa3_RV                   | <u>CTCATCAAGTTGTAATGCTAAAATGCTTC</u> GTGTTTTAGGATATCTAGTGG      |
|                              | TTHERM_00082190_DelCheck_FW  | ATTTTCATTTTCGCTCGCTAAGCAGC                                      |
|                              | TTHERM_00082190_DelCheck_RV  | AGCATCATATAGAAGCATCGATAGAG                                      |
| TTHERM_00112830              | cDelSa4_FW                   | <u>CTTTATTGTTATCATCTTATGACCGCTTA</u> ATGGAGTAATTAATTCACATG      |
|                              | cDelSa4_RV                   | <u>CTCATCAAGTTGTAATGCTAAAATGCAG</u> ATTCACGCCCTCAGTTGTTC        |
|                              | TTHERM_00112830_DelCheck_FW  | TGTTAGTGTAAGTTTAGATACCAAG                                       |
|                              | TTHERM_00112830_DelCheck_RV  | ATCAGTGGAGTTAGATAATTCAGG                                        |
| TTHERM_00285420 (DED2)       | cDelSa17_FW                  | <u>CTTTATTGTTATCATCTTATGACCGCTGA</u> ATACACGAAATTCATTCAGAG      |
|                              | cDelSa17_FW5                 | <u>CTTTATTGTTATCATCTTATGACCGCCAT</u> AGAGAAAGATACCATTCTTAACCG   |
|                              | cDelSa17_RV                  | <u>CTCATCAAGTTGTAATGCTAAAATGCAG</u> ACTGTTAGAAACTTAGTTTC        |
|                              | cDelSa17_RV2                 | <u>CTCATCAAGTTGTAATGCTAAAATGCA</u> ATCCAAATGATGTCATATGTGAG      |
|                              | cDelSa17_RV3                 | <u>CTCATCAAGTTGTAATGCTAAAATGCT</u> TGAGGATAATCTTCTAAGCTAGCAG    |
|                              | cDelSa17_RV4                 | <u>CTCATCAAGTTGTAATGCTAAAATGC</u> ACTAGTTTACACTTTAATGCTCTGC     |
|                              | TTHERM_00285420_DelCheck_FW  | TCCTCCGAAAGAAGAACTAATCCCTC                                      |
|                              | TTHERM_00285420_DelCheck_RV  | TTGAGGATAATCTTCTAAGCTAGCAG                                      |
|                              | Sa17_DelCheck_RV2            | TCAATCAATAAAAGAGTAATACTTGTTC                                    |
|                              | Sa17_DelCheck_RV3            | TTATCTCAACTGTTTTTAAATCCCTC                                      |
| Sa17_DelCheck_RV4            | ATCTGTTTTAATACATGCTAGCTGTC   |                                                                 |
| TTHERM_00301940 (DED1)       | cDelSa2_FW                   | <u>CTTTATTGTTATCATCTTATGACCGCTG</u> ATTGGAGGATTGAATCAGAAGC      |
|                              | cDelSa2_RV                   | <u>CTCATCAAGTTGTAATGCTAAAATGC</u> ATATTTGATTTTTAGCACATGGC       |
|                              | TTHERM_00301940_DelCheck_FW  | TCTTACGAATCCCATAGATCCCACTG                                      |
|                              | TTHERM_00301940_DelCheck_RV  | TGCTACGAAAGAAGTTAATTAGCTCC                                      |
| TTHERM_00399200              | cDelSa7_FW                   | <u>CTTTATTGTTATCATCTTATGACCGCAT</u> TCAAAGACACCTATGATGATGC      |
|                              | cDelSa7_RV                   | <u>CTCATCAAGTTGTAATGCTAAAATGCT</u> GGCTATTGTTGATTCCCAAGTG       |
|                              | cDelSa7_FW2                  | <u>CTTTATTGTTATCATCTTATGACCGCC</u> ACATTTACTTAAGAAACTCAAAGG     |
|                              | cDelSa7_RV2                  | <u>CTCATCAAGTTGTAATGCTAAAATG</u> CTAAAATAGTAAGTTATGTTCCACTG     |
|                              | TTHERM_00399200_DelCheck_FW  | ATATGCCAGTAACTACGATTTAAGAGG                                     |
|                              | TTHERM_00399200_DelCheck_RV1 | TAACCACCTCGGCCAAGTGTCC                                          |
| TTHERM_00399200_DelCheck_RV2 | AAGTCAATCAATACCTTAATAAGTACAG |                                                                 |
| TTHERM_00313180              | cDelSa19_FW                  | <u>CTTTATTGTTATCATCTTATGACCGCT</u> TATAAAGTTTCTAAAATGAGCTCC     |
|                              | cDelSa19_RV                  | <u>CTCATCAAGTTGTAATGCTAAAATGC</u> ATTTTTATACCAGAATTGAATCC       |
|                              | Sa19_DelCheck_FW             | TTAGTTAAAGCCCTCATTTAAGATCAGC                                    |
|                              | Sa19_DelCheck_RV             | TGTATAAATTTTATTAATATTTAATGAGCTACC                               |
| TTHERM_00460720              | cDelSa15_FW                  | <u>CTTTATTGTTATCATCTTATGACCGCTG</u> GAGAATAAATATATCGAAGAGCTG    |
|                              | cDelSa15_RV                  | <u>CTCATCAAGTTGTAATGCTAAAATGCT</u> TGATATGTAATTCATTTTCC         |
|                              | cDelSa15_FW2                 | <u>CTTTATTGTTATCATCTTATGACCGC</u> AGACAATTTAGATTGGTATAGCAG      |
|                              | cDelSa15_RV2                 | <u>CTCATCAAGTTGTAATGCTAAAATG</u> CTTGCAAAATGAAATTCATTCATC       |
|                              | TTHERM_00460720_DelCheck_FW2 | TGGATGGATCCAAAAGCTATTCTCC                                       |
|                              | TTHERM_00460720_DelCheck_FW1 | TTAGTCACCTACAAGCTTAAAGCAC                                       |
| TTHERM_00460720_DelCheck_RV  | AGTTGCCATTTTCTTCAATTTGGCATCC |                                                                 |
| TTHERM_00494510              | cDelSa12_FW                  | <u>CTTTATTGTTATCATCTTATGACCGC</u> ACAAATCATCAATGAAAACACC        |
|                              | cDelSa12_RV                  | <u>CTCATCAAGTTGTAATGCTAAAATGC</u> AGATTTAAACTTCTTTGTTAAACTCC    |
|                              | TTHERM_00494510_DelCheck_FW  | TAAGAGCCAGAATGCTTCCAGC                                          |
|                              | TTHERM_00494510_DelCheck_RV  | TAACTGTTTCCCTGAGTTTTCGAGCTC                                     |
| TTHERM_00520940              | cDelSa13_FW                  | <u>CTTTATTGTTATCATCTTATGACCGC</u> AGGGGTAGAAGCTAAAATGACCGC      |
|                              | cDelSa13_RV                  | <u>CTCATCAAGTTGTAATGCTAAAATGC</u> ATCTTCTACATGAAGGATATCTCCG     |
|                              | TTHERM_00520940_DelCheck_FW  | TATGTTTACTATGATTTCTTCTTTGGC                                     |
|                              | TTHERM_00520940_DelCheck_RV  | ATCGCATCATCAAATGCAAATGCACC                                      |
| TTHERM_00565620              | cDelSa6_FW                   | <u>CTTTATTGTTATCATCTTATGACCGC</u> AAAACAAGTCTATATGGTAGC         |
|                              | cDelSa6_RV                   | <u>CTCATCAAGTTGTAATGCTAAAATGC</u> AGGAGAATGATTTCTGAGCTGTGC      |
|                              | TTHERM_00565620_DelCheck_FW  | TGACTCACTTAAACAGTACTGTTCG                                       |
|                              | TTHERM_00565620_DelCheck_RV  | TTTATTCATCCTAGCTGCTTAGGC                                        |
| TTHERM_00584620              | cDelSa5_FW                   | <u>CTTTATTGTTATCATCTTATGACCGC</u> TATGTTGATAAAGCTGACCATCC       |
|                              | cDelSa5_RV                   | <u>CTCATCAAGTTGTAATGCTAAAATGC</u> AGATTTTGTCTCTTAATTTATTCGATGCC |
|                              | Sa5_DelCheck_FW              | ACCTCTGAAAATCAATGCCTTATAGCC                                     |
|                              | Sa5_DelCheck_RV              | AGCTTATTTATGAATGCAGCTGGTTGG                                     |
| TTHERM_00675560              | cDelSa16_FW                  | <u>CTTTATTGTTATCATCTTATGACCGC</u> TAAATCTGTGCCACTTCAG           |
|                              | cDelSa16_RV                  | <u>CTCATCAAGTTGTAATGCTAAAATGCT</u> TAAAGGACTCACTAAGATTTACAGG    |
|                              | cDelSa16_RV2                 | <u>CTCATCAAGTTGTAATGCTAAAATGC</u> ATAAACATCCATGTCTTCAAAGG       |
|                              | TTHERM_00675560_DelCheck_FW  | TCATTTTCATCATTTTTCAATAGGTGTC                                    |
|                              | TTHERM_00675560_DelCheck_RV1 | TCGTAAAATGTTTAAAGCTCCTCCCAAGC                                   |
|                              | Sa16_DelCheck_RV2            | TGCTTAAAGGATTCATCGCTGTTCTGC                                     |

|                         |                                                                                                                                                      |                                                                                                                                                                                                                                                                                                                                                                                               |
|-------------------------|------------------------------------------------------------------------------------------------------------------------------------------------------|-----------------------------------------------------------------------------------------------------------------------------------------------------------------------------------------------------------------------------------------------------------------------------------------------------------------------------------------------------------------------------------------------|
| TTHERM_00841280         | cDelSa18_FW<br>cDelSa18_RV<br>Sa18_DelCheck_FW<br>Sa18_DelCheck_RV                                                                                   | <u>CTTTATTGTTATCATCTTATGACCCGCAATGAAGTAGAAAGACGTGCGTG</u><br><u>CTCATCAAGTTGTAATGCTAAAATGCAGGATCAAAAATTTGAGAAGTCTGCTG</u><br><u>TGATTCAGCACCAATTTTATCTCCAGGC</u><br><u>ACCATTAGAGTGGGGTCTTCAATAGC</u>                                                                                                                                                                                         |
| TTHERM_01044400         | cDelSa11_FW<br>cDelSa11_RV<br>TTHERM_01044400_DelCheck_FW<br>TTHERM_01044400_DelCheck_RV1                                                            | <u>CTTTATTGTTATCATCTTATGACCCGCAATGGAGAAATCGTTAGCTTACAC</u><br><u>CTCATCAAGTTGTAATGCTAAAATGCTGATTTGATTGCTGCTTTCTGTGATG</u><br><u>AGATAAGATATTTCTCCTATTCTCAGC</u><br><u>ATGAATTCAAAAGTTGGCATCATAG</u>                                                                                                                                                                                           |
| TTHERM_01344740         | cDelSa10_FW<br>cDelSa10_RV<br>TTHERM_01344740_DelCheck_FW<br>TTHERM_01344740_DelCheck_RV                                                             | <u>CTTTATTGTTATCATCTTATGACCCGATAGTAGAAATTAGAGATGGCCAG</u><br><u>CTCATCAAGTTGTAATGCTAAAATGCTGATGTTAGACTGTAAGTGTGATAG</u><br><u>AGGTATTTCACTCTAGTTAATTAGGAG</u><br><u>TCATAAAAAACAGTATTGAGGAAGTAC</u>                                                                                                                                                                                           |
| TTHERM_00388160         | Log1_cDelFW<br>Log1_cDelRV<br>Log1_DelCheckFW<br>Log1_DelCheckRV                                                                                     | <u>CTTTATTGTTATCATCTTATGACCCGAGGTATTGTTGCTCTTTTCTATGCC</u><br><u>CTCATCAAGTTGTAATGCTAAAATGCTACTACTAAGTACTTGACTGC</u><br><u>TC TAAGACTGCTGAAACAAGAGTGAC</u><br><u>ACATAATTGGATGTAAAACATCATTCCTC</u>                                                                                                                                                                                            |
| TTHERM_00408840         | Log2_cDelFW<br>Log2_cDelRV<br>Log2_DelCheckFW<br>Log2_DelCheckRV                                                                                     | <u>CTTTATTGTTATCATCTTATGACCCGCTTATCCTGATTGTACGATTATGACTC</u><br><u>CTCATCAAGTTGTAATGCTAAAATGCTACTTCTAATTTACATCCTGAGAGGAC</u><br><u>ACCCCAACAATAACTTTAAGCAACC</u><br><u>TATACAAATTTATTAATAATCTGGAAGTC</u>                                                                                                                                                                                      |
| TTHERM_00935580         | Stv1_cDelFW<br>Stv1_cDelRV<br>Stv1_DelCheckFW<br>Stv1_DelCheckRV                                                                                     | <u>CTTTATTGTTATCATCTTATGACCCGAGATTAGTGGTAGGCAATTCAGTTGC</u><br><u>CTCATCAAGTTGTAATGCTAAAATGCAACAGAATTACCAGGAGCAGCAGC</u><br><u>TTAGAAAGGCTGAATGACTTCCCATG</u><br><u>ATCATAGCTAATTAATAATTCGCACATC</u>                                                                                                                                                                                          |
| TWI2, TWI6 and TWI7     | TWI2_cDelFW<br>TWI2_cDelRV<br>TWI2_DelCheckFW2<br>TWI2_DelCheckRV2<br>TWI6_DelCheckFW<br>TWI6_DelCheckRV<br>TWI7_DelCheckFW2<br>TWI7_DelCheckRV2     | <u>CTTTATTGTTATCATCTTATGACCCGCTGATGAACCTCAAGGATTGTG</u><br><u>CTCATCAAGTTGTAATGCTAAAATGCTTTGTTTTGCTGCTTAAAAATCTG</u><br><u>ATTTTAAAGTTTTTAAAGATCGCTGTTTGC</u><br><u>AGTTATCAAGTAGTTAGTTCTGGCTGG</u><br><u>TGCTTTGTTAGCAGTATCTATTAATTGC</u><br><u>TTGTTAAAATAATAAAAATTCGATGAAGC</u><br><u>TCAAGCTTCACTTATTGCCATTAATGCTC</u><br><u>TCAAATCTATCTCTTAGTCTCGCATGC</u>                              |
| XRN2 and XRN4           | XRN2_cDelFW<br>XRN2_cDelRV_XRN4c<br>XRN4_cDelFW_XRN2c<br>XRN4_cDelRV<br>XRN2_DelCheck_FW<br>XRN2_DelCheck_RV<br>XRN4_DelCheck_FW<br>XRN4_DelCheck_RV | <u>CTTTATTGTTATCATCTTATGACCCGCTGTTCCAGCATTTCTTAGTGCC</u><br><u>GCTGTTGATTGATGGAATTCCTTAGGGCTCATGAGTACTTAATCC</u><br><u>GGATTAAGTACTCATGAGCCCTAGAGAATCCATCAATACACAGC</u><br><u>CTCATCAAGTTGTAATGCTAAAATGCTCCATTCAGAAAGGATACATACGC</u><br><u>TCCTATTTATTTAAATAAATCCTTAGTC</u><br><u>ACTTTTCTCATCCTTTAATCTCCACTC</u><br><u>TAATAAATAATGGCCCTTCTACACAG</u><br><u>TGTTTAAATAAGAAAAACACTCGCTTGC</u> |
| complementation of DED1 | Sa2_Res_5FW<br>Sa2_Res_5RV<br>Sa2_ResHA_5RV<br>Sa2_Res_3FW<br>Sa2_Res_3RV                                                                            | <u>CTCTAGAGCATGCGCTAGCGGATCCTGTTGATGAAATGTGCCATTCAGC</u><br><u>GACCGATTCAAGTTGCTCAATCATTGCATATTTGATTTTTTAGCACATGGC</u><br><u>CAGGAACATCATAAGGATAggaaccTTGCATATTGATTTTTTAGCACATGGC</u><br><u>GCTTATCGATACCGCTCGACCTGATAATTTAGAAACTTTCAACAAGAG</u><br><u>GGGTACCGGGCCCCCTCGAGAAGAGACTCGTTTCAATTCATCC</u>                                                                                        |
