# Supplementary material
Source: PubMed Central journal article supplement (PMC4566276)
Supplement: 10.1534_115.178525_genetics.115.178525-2.pdf [file 10.1534_115.178525_genetics.115.178525-2.pdf]

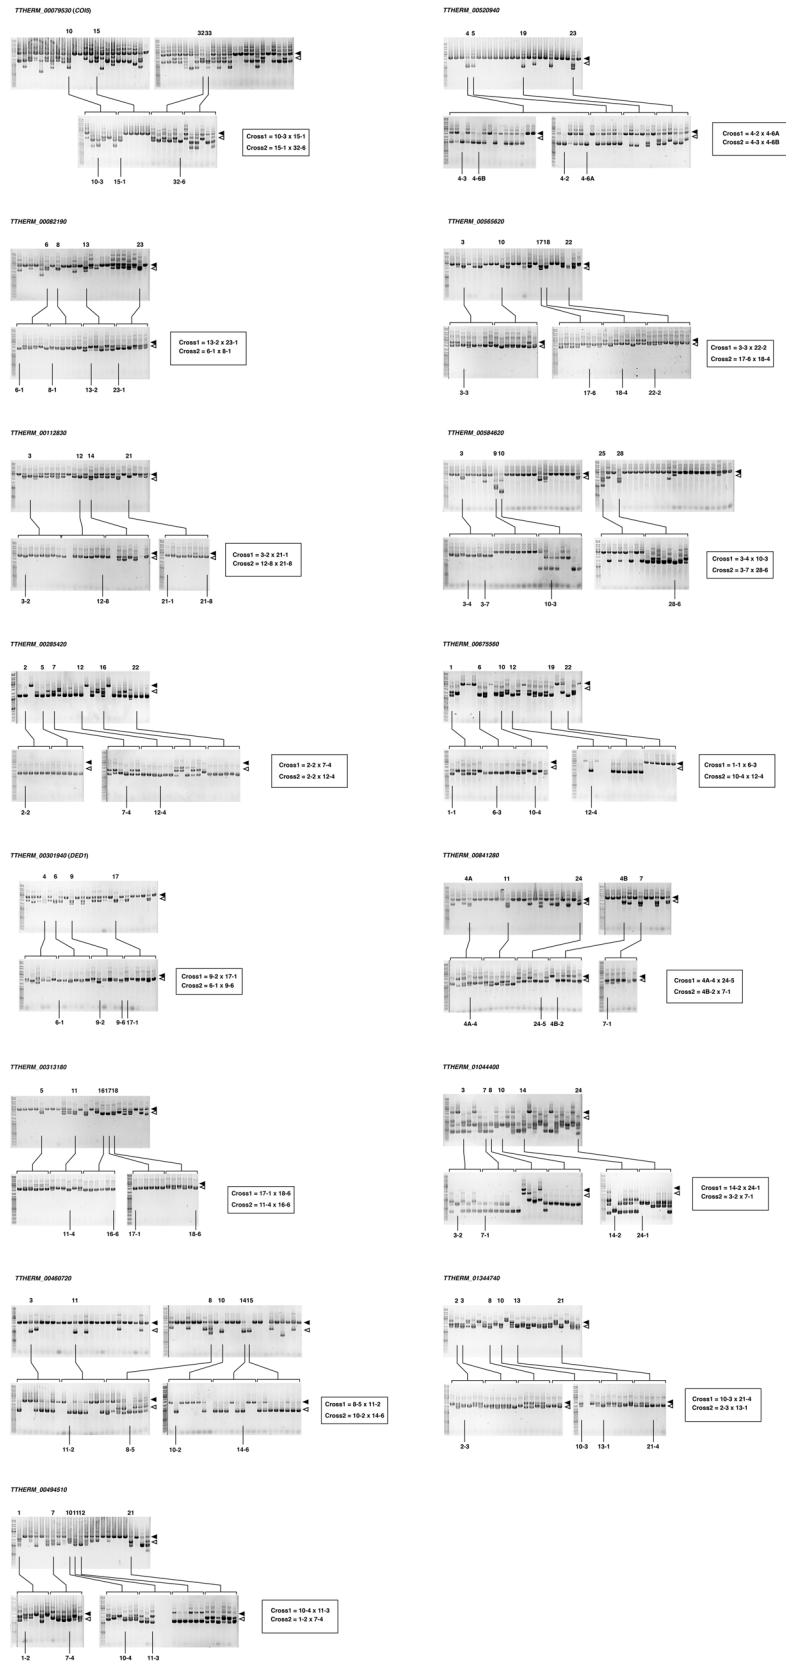

Figure S2. Establishment of KO strains by coDel

Establishment of KO strains by coDel. Progeny lines with nearly complete deletion at the indicated gene loci by coDel (top) were cultured for 12 passages to allow random assortment of the loci and sexual maturation. Then, 6-8 clonal cell lines were established from each progeny and analyzed by genomic PCR (bottom). Indicated cells lines were chosen and used for a DNA elimination assay.
