# Supplementary material
Source: PubMed Central journal article supplement (PMC4566276)
Supplement: 10.1534_115.178525_genetics.115.178525-3.pdf [file 10.1534_115.178525_genetics.115.178525-3.pdf]

**Table S2. The sequences of the primers used in this study**

| target                       | primer name                  | sequence (5' to 3')                                            |
|------------------------------|------------------------------|----------------------------------------------------------------|
| TTHERM_00079530 (COI5)       | cDelSa1_FW                   | <u>CTTTATTGTTATCATCTTATGACCGCTGTT</u> CAGCTCTAATTACTCG         |
|                              | cDelSa1_RV                   | <u>CTCATCAAGTTGTAATGCTAAAATGCT</u> TAATCAITACCATTCTTCTACAGGC   |
|                              | TTHERM_00079530_DelCheck_FW  | ATGAACGATAGTAAACAGCTACTCAC                                     |
|                              | TTHERM_00079530_DelCheck_RV  | AGCTTGATGAGCAATTCACGACAG                                       |
| TTHERM_00082190              | cDelSa3_FW                   | <u>CTTTATTGTTATCATCTTATGACCGCTT</u> GTATGGTCTGTTCATCCCTC       |
|                              | cDelSa3_RV                   | <u>CTCATCAAGTTGTAATGCTAAAATGCTT</u> CTGTTTTAGGATATCTAGTGG      |
|                              | TTHERM_00082190_DelCheck_FW  | ATTTTCATTTTCGCTCGCTAAGCAGC                                     |
|                              | TTHERM_00082190_DelCheck_RV  | AGCATCATATAGAAGCATCGATAGAG                                     |
| TTHERM_00112830              | cDelSa4_FW                   | <u>CTTTATTGTTATCATCTTATGACCGCTT</u> AATGGAGTAATTAATTCACATG     |
|                              | cDelSa4_RV                   | <u>CTCATCAAGTTGTAATGCTAAAATGC</u> AGATCCACGCCCTCAGTTGTTC       |
|                              | TTHERM_00112830_DelCheck_FW  | TGTTAGTGTAAGTTTAGATACCAAG                                      |
|                              | TTHERM_00112830_DelCheck_RV  | ATCAGTGGAGTTAGATAATTCAGG                                       |
| TTHERM_00285420 (DED2)       | cDelSa17_FW                  | <u>CTTTATTGTTATCATCTTATGACCGCTG</u> AATACACTGAAATTCATTCAGAG    |
|                              | cDelSa17_FW5                 | <u>CTTTATTGTTATCATCTTATGACCGCC</u> ATAGAGAAAGATACCATTCTTAACCC  |
|                              | cDelSa17_RV                  | <u>CTCATCAAGTTGTAATGCTAAAATGC</u> AGGACTGTTAGAAACTTAGTTC       |
|                              | cDelSa17_RV2                 | <u>CTCATCAAGTTGTAATGCTAAAATGC</u> AATCCAAATGATGTCATATGTGAG     |
|                              | cDelSa17_RV3                 | <u>CTCATCAAGTTGTAATGCTAAAATGCT</u> TGAGGATAATCTCTAAGCTAGCAG    |
|                              | cDelSa17_RV4                 | <u>CTCATCAAGTTGTAATGCTAAAATGC</u> ACTAGTTTACACTTTAATGCTCTGC    |
|                              | TTHERM_00285420_DelCheck_FW  | TCTCCGAAAGAAGAACTAATCCTC                                       |
|                              | TTHERM_00285420_DelCheck_RV  | TTGAGGATAATCTCTAAGCTAGCAG                                      |
|                              | Sa17_DelCheck_RV2            | TCAATCAATAAAGAGTGAATACTTGTTC                                   |
|                              | Sa17_DelCheck_RV3            | TTATCTCAACTTGTTTTTAATCCCTC                                     |
| Sa17_DelCheck_RV4            | ATCTGTTTTAATACATGCTAGCTGTC   |                                                                |
| TTHERM_00301940 (DED1)       | cDelSa2_FW                   | <u>CTTTATTGTTATCATCTTATGACCGCT</u> GATTGGAGGATTGAATCAGAAGC     |
|                              | cDelSa2_RV                   | <u>CTCATCAAGTTGTAATGCTAAAATGC</u> ATATTGATTTTTAGCACATGGC       |
|                              | TTHERM_00301940_DelCheck_FW  | TCTTACGAATCCCATAGATCCCACTG                                     |
|                              | TTHERM_00301940_DelCheck_RV  | TGCTACGAAAGAAGTTAATTAGCTCC                                     |
| TTHERM_00399200              | cDelSa7_FW                   | <u>CTTTATTGTTATCATCTTATGACCGC</u> ATTCAAAGACACCTATGATGATGC     |
|                              | cDelSa7_RV                   | <u>CTCATCAAGTTGTAATGCTAAAATGC</u> TGGCTATTGTTGATTCCCAAGTG      |
|                              | cDelSa7_FW2                  | <u>CTTTATTGTTATCATCTTATGACCGC</u> CACTTTACTTAAGAAACTCAAAGG     |
|                              | cDelSa7_RV2                  | <u>CTCATCAAGTTGTAATGCTAAAATGC</u> TAAATAGTAAGTTATTGTTCCCACTG   |
|                              | TTHERM_00399200_DelCheck_FW  | ATATGCCAGTAACTACGATTTAAGAGG                                    |
|                              | TTHERM_00399200_DelCheck_RV1 | TAACCACCTCGCCAAAGTGTC                                          |
| TTHERM_00399200_DelCheck_RV2 | AAGTCAATCAATACCTTAATAAGTACAG |                                                                |
| TTHERM_00313180              | cDelSa19_FW                  | <u>CTTTATTGTTATCATCTTATGACCGC</u> TATAAACTTTCTAAATGAGCTCC      |
|                              | cDelSa19_RV                  | <u>CTCATCAAGTTGTAATGCTAAAATGC</u> GATTTTATACCAGAATTGAATCC      |
|                              | Sa19_DelCheck_FW             | TTAGTTAAGCCCTCATTAAGATCAGC                                     |
|                              | Sa19_DelCheck_RV             | TGTATAAATTTTATTAAATTTAATGAGCTACC                               |
| TTHERM_00460720              | cDelSa15_FW                  | <u>CTTTATTGTTATCATCTTATGACCGC</u> TGGAGAATAATTATATCGAAGAGCTG   |
|                              | cDelSa15_RV                  | <u>CTCATCAAGTTGTAATGCTAAAATGC</u> TGATATGTAATTCATTTTCC         |
|                              | cDelSa15_FW2                 | <u>CTTTATTGTTATCATCTTATGACCGC</u> AGACAATTTAGATTGGTATAGCAG     |
|                              | cDelSa15_RV2                 | <u>CTCATCAAGTTGTAATGCTAAAATGC</u> TGCAAAATGAAATTCATTCATC       |
|                              | TTHERM_00460720_DelCheck_FW2 | TGGATGGATCCAAAAGCTATTCTCC                                      |
| TTHERM_00460720_DelCheck_FW1 | TTAGTCACCTACAAGCTTAAAGCAC    |                                                                |
| TTHERM_00460720_DelCheck_RV  | AGTTGCCATTTTCTTCATTGGCATCC   |                                                                |
| TTHERM_00494510              | cDelSa12_FW                  | <u>CTTTATTGTTATCATCTTATGACCGC</u> ACAAATCATCAATGAAAACACC       |
|                              | cDelSa12_RV                  | <u>CTCATCAAGTTGTAATGCTAAAATGC</u> AGATTTAAACTTCTTTGTTAAACTCC   |
|                              | TTHERM_00494510_DelCheck_FW  | TAAGAGCCAGAATGCTTCCAGC                                         |
|                              | TTHERM_00494510_DelCheck_RV  | TAACTGTTTCCCTGAGTTTTCGAGCTC                                    |
| TTHERM_00520940              | cDelSa13_FW                  | <u>CTTTATTGTTATCATCTTATGACCGC</u> AGGGTAGAAGCTAAAATGACCGC      |
|                              | cDelSa13_RV                  | <u>CTCATCAAGTTGTAATGCTAAAATGC</u> ATCTTCTACATGAAGGATATCTCCGC   |
|                              | TTHERM_00520940_DelCheck_FW  | TATGTTTACTATGATTTCTTCTTTGCC                                    |
| TTHERM_00520940_DelCheck_RV  | ATCGCATCATCAAATGCAAATGCACC   |                                                                |
| TTHERM_00565620              | cDelSa6_FW                   | <u>CTTTATTGTTATCATCTTATGACCGC</u> AAAACAAGTCTATATGGTAGC        |
|                              | cDelSa6_RV                   | <u>CTCATCAAGTTGTAATGCTAAAATGC</u> AGGAGAATGATTCTGAGCTGTGC      |
|                              | TTHERM_00565620_DelCheck_FW  | TGACTCACTTAAACAGTACTGTTCCG                                     |
| TTHERM_00565620_DelCheck_RV  | TTTATTTCATCTAGCTGTTTAGGC     |                                                                |
| TTHERM_00584620              | cDelSa5_FW                   | <u>CTTTATTGTTATCATCTTATGACCGC</u> TATGTTGATAAAGCTGACCATCC      |
|                              | cDelSa5_RV                   | <u>CTCATCAAGTTGTAATGCTAAAATGC</u> AGATTTTGTCTCTAATTTATTCGATGCC |
|                              | Sa5_DelCheck_FW              | ACCTCTGAAAATCAATGCCTTATAGCC                                    |
|                              | Sa5_DelCheck_RV              | AGCTTATTTATTGAATGCAGCTGGTTGG                                   |
| TTHERM_00675560              | cDelSa16_FW                  | <u>CTTTATTGTTATCATCTTATGACCGC</u> TAAATCTGCTGCCACTTCAG         |
|                              | cDelSa16_RV                  | <u>CTCATCAAGTTGTAATGCTAAAATGC</u> TAAAGGACTCACTAAGATTTACAGG    |
|                              | cDelSa16_RV2                 | <u>CTCATCAAGTTGTAATGCTAAAATGC</u> ATAAACATCCATGCTTCAAACGAG     |
|                              | TTHERM_00675560_DelCheck_FW  | TCATTTTCATCATTTTCAATAGGTGTC                                    |
|                              | TTHERM_00675560_DelCheck_RV1 | TCTGTAAAATGTTTAAAGCTCCTCCAAGC                                  |
| Sa16_DelCheck_RV2            | TGCTTAAAGGATTCATCGCTGTTCTGC  |                                                                |

|                         |                                                                                                                                                      |                                                                                                                                                                                                                                                                                                                                                                                               |
|-------------------------|------------------------------------------------------------------------------------------------------------------------------------------------------|-----------------------------------------------------------------------------------------------------------------------------------------------------------------------------------------------------------------------------------------------------------------------------------------------------------------------------------------------------------------------------------------------|
| TTHERM_00841280         | cDelSa18_FW<br>cDelSa18_RV<br>Sa18_DelCheck_FW<br>Sa18_DelCheck_RV                                                                                   | <u>CTTTATTGTTATCATCTTATGACCCGCAATGAAGTAGAAAGACGTGCGTG</u><br><u>CTCATCAAGTTGTAATGCTAAAATGCAGGATCAAAATTTGAGAAGTCTGCTG</u><br><u>TGATTCAGCACCAATTTTATCTCCAGGC</u><br><u>ACCATTAGAGTGGGGATCTTCAATAGC</u>                                                                                                                                                                                         |
| TTHERM_01044400         | cDelSa11_FW<br>cDelSa11_RV<br>TTHERM_01044400_DelCheck_FW<br>TTHERM_01044400_DelCheck_RV1                                                            | <u>CTTTATTGTTATCATCTTATGACCCGCAATGGAGAAATCGTTAGCTTACAC</u><br><u>CTCATCAAGTTGTAATGCTAAAATGCTGATTTTGATTGCTGCTTTCTGTGATG</u><br><u>AGATAAGATATTTCTCCTATTCTCAGC</u><br><u>ATGAATTCAAAAGTTGGCATCATAG</u>                                                                                                                                                                                          |
| TTHERM_01344740         | cDelSa10_FW<br>cDelSa10_RV<br>TTHERM_01344740_DelCheck_FW<br>TTHERM_01344740_DelCheck_RV                                                             | <u>CTTTATTGTTATCATCTTATGACCCGATAGTAGAAATTAGAGATGGCCAG</u><br><u>CTCATCAAGTTGTAATGCTAAAATGCTGATGTGTAGACTGTAAGTGTGACTAG</u><br><u>AGGTATTTCACTCTAGTTAATTAGGAG</u><br><u>TCTATAAAAAACAGTATTGAGGAAGTAC</u>                                                                                                                                                                                        |
| TTHERM_00388160         | Log1_cDelFW<br>Log1_cDelRV<br>Log1_DelCheckFW<br>Log1_DelCheckRV                                                                                     | <u>CTTTATTGTTATCATCTTATGACCCGAGGATTTGTTGCTTCTTTCTATGCC</u><br><u>CTCATCAAGTTGTAATGCTAAAATGCTACTACTAAGTACTTGACTGC</u><br><u>TCTAAGACTGCTGAAACAAGAGTGAC</u><br><u>ACATAATTGGATGTAAAACATCATTCCTC</u>                                                                                                                                                                                             |
| TTHERM_00408840         | Log2_cDelFW<br>Log2_cDelRV<br>Log2_DelCheckFW<br>Log2_DelCheckRV                                                                                     | <u>CTTTATTGTTATCATCTTATGACCCGCTTATCCTGATTGTACGATTATGACTC</u><br><u>CTCATCAAGTTGTAATGCTAAAATGCTACTTCTAATTTACATCCTGAGAGGAC</u><br><u>ACCCCAACAATAACTTTAAGCAACC</u><br><u>TATACAAATTTATTAATAATCTGGAAAGTC</u>                                                                                                                                                                                     |
| TTHERM_00935580         | Stv1_cDelFW<br>Stv1_cDelRV<br>Stv1_DelCheckFW<br>Stv1_DelCheckRV                                                                                     | <u>CTTTATTGTTATCATCTTATGACCCGAGATTTAGTGGTAGGCAATTCAAGTTGC</u><br><u>CTCATCAAGTTGTAATGCTAAAATGCAACAGAATTACCAGGAGCAGCAGC</u><br><u>TTAGAAAGGCTGAATGACTTCCCATG</u><br><u>ATCATAGCTAATTAATAATTCGCACATC</u>                                                                                                                                                                                        |
| TWI2, TWI6 and TWI7     | TWI2_cDelFW<br>TWI2_cDelRV<br>TWI2_DelCheckFW2<br>TWI2_DelCheckRV2<br>TWI6_DelCheckFW<br>TWI6_DelCheckRV<br>TWI7_DelCheckFW2<br>TWI7_DelCheckRV2     | <u>CTTTATTGTTATCATCTTATGACCCGCTGATGAACCTCAAGGATTTGTG</u><br><u>CTCATCAAGTTGTAATGCTAAAATGCTTTGTTTTGCTGCTTAAAAATCTG</u><br><u>ATTTTAAAGTTTTTAAGATCGCTGTTTTGC</u><br><u>AGTTATCAAGTAGTTAGTTCTGGCTGG</u><br><u>TGCTTTGTTAGCAGTATCTATTAATTGC</u><br><u>TTGTTAAATAATAATAAATTTTCGATGAAGC</u><br><u>TCAAGCTTCACTTATTGCCATTAATGCTC</u><br><u>TCAAATCTATCTCTTTAGTCTCGCATGC</u>                          |
| XRN2 and XRN4           | XRN2_cDelFW<br>XRN2_cDelRV_XRN4c<br>XRN4_cDelFW_XRN2c<br>XRN4_cDelRV<br>XRN2_DelCheck_FW<br>XRN2_DelCheck_RV<br>XRN4_DelCheck_FW<br>XRN4_DelCheck_RV | <u>CTTTATTGTTATCATCTTATGACCCGCTGTTCCAGCATTCTTTAGTGGC</u><br><u>GCTGTGATTTGATGGAATTCCTTAGGGCTCATGAGTACTTAATCC</u><br><u>GGATTAAGTACTCATGAGCCCTAGAGAATTCATCAATACACAGC</u><br><u>CTCATCAAGTTGTAATGCTAAAATGCTCCATTCAGAAAGGATACATACGC</u><br><u>TCCTATTTATTATTAATAAATCCTTAGTC</u><br><u>ACTTTTTCTCATCCTTTAATCTCCACTC</u><br><u>TAATAAATAATGGCCCTTCTACACAG</u><br><u>TGTTAATAAGAAAAACACTCGCTTGC</u> |
| complementation of DED1 | Sa2_Res_5FW<br>Sa2_Res_5RV<br>Sa2_ResHA_5RV<br>Sa2_Res_3FW<br>Sa2_Res_3RV                                                                            | <u>CTCTAGAGCATGCGCTAGCGGATCCTGTTGATGAAATGTGCCATTGAGC</u><br><u>GACCGATTCAAGTTGCTCAATCATTGCATATTTGATTTTTTAGCACATGGC</u><br><u>CAGGAACATCATAAGGATAggaaccTTGCATATTTGATTTTTTAGCACATGGC</u><br><u>GCTTATCGATACCGCTCGACCTGATAATTTAGAAACTTTCAACAAGAG</u><br><u>GGGTACCGGGCCCCCTCGAGAAGAGACTCGTTTCAATTCATCC</u>                                                                                       |
