# Supplementary material
Source: PubMed Central journal article supplement (PMC4566276)
Supplement: 10.1534_115.178525_genetics.115.178525-5.pdf [file 10.1534_115.178525_genetics.115.178525-5.pdf]

**Table S1. The genomic locations of the codel targets and the names of the primers used for target amplification and for genomic PCR checking codel**

| Target gene            | Corresponding Figs/Tables | MAC genomic position of target<br>MAC SCh | start   | end     | Primer 1<br>Primer set used for target amplification | Primer 2     | Primer 1<br>Primer set used for deletion check | Primer 2                     |
|------------------------|---------------------------|-------------------------------------------|---------|---------|------------------------------------------------------|--------------|------------------------------------------------|------------------------------|
| TTHERM_00079530 (CO15) | Fig. 1; Table 1           | 3828                                      | 1004795 | 1005509 | cDeISa1_FW                                           | cDeISa1_RV   | TTHERM_00079530_DelCheck_FW                    | TTHERM_00079530_DelCheck_RV  |
| TTHERM_00082190        | Fig. 1; Table 1           | 3836                                      | 1201352 | 1201965 | cDeISa3_FW                                           | cDeISa3_RV   | TTHERM_00082190_DelCheck_FW                    | TTHERM_00082190_DelCheck_RV  |
| TTHERM_00112830        | Fig. 1; Table 1           | 3812                                      | 682512  | 683218  | cDeISa4_FW                                           | cDeISa4_RV   | TTHERM_00112830_DelCheck_FW                    | TTHERM_00112830_DelCheck_RV  |
| TTHERM_00285420 (DE02) | Fig. 1, 3; Table 1        | 3688                                      | 58874   | 59545   | cDeISa17_FW                                          | cDeISa17_RV  | TTHERM_00285420_DelCheck_FW                    | TTHERM_00285420_DelCheck_RV  |
| TTHERM_00285420 (DE02) | Fig. 3                    | 3688                                      | 58525   | 59196   | cDeISa17_FW5                                         | cDeISa17_RV2 | TTHERM_00285420_DelCheck_FW                    | TTHERM_00285420_DelCheck_RV2 |
| TTHERM_00285420 (DE02) | Fig. 3                    | 3688                                      | 58525   | 59545   | cDeISa17_FW                                          | cDeISa17_RV2 | TTHERM_00285420_DelCheck_FW                    | TTHERM_00285420_DelCheck_RV2 |
| TTHERM_00285420 (DE02) | Fig. 3                    | 3688                                      | 58067   | 59545   | cDeISa17_FW                                          | cDeISa17_RV3 | TTHERM_00285420_DelCheck_FW                    | TTHERM_00285420_DelCheck_RV3 |
| TTHERM_00285420 (DE02) | Fig. 3                    | 3688                                      | 57524   | 59545   | cDeISa17_FW                                          | cDeISa17_RV4 | TTHERM_00285420_DelCheck_FW                    | TTHERM_00285420_DelCheck_RV4 |
| TTHERM_00301940 (DED1) | Fig. 1, 2, 6; Table 1     | 3691                                      | 710271  | 710862  | cDeISa2_FW                                           | cDeISa2_RV   | TTHERM_00301940_DelCheck_FW                    | TTHERM_00301940_DelCheck_RV  |
| TTHERM_00399200        | Fig. 1; Table 1           | 3713                                      | 73945   | 74523   | cDeISa7_FW                                           | cDeISa7_RV   | TTHERM_00399200_DelCheck_FW                    | TTHERM_00399200_DelCheck_RV  |
| TTHERM_00313180        | Fig. 1; Table 1           | 3810                                      | 469974  | 470526  | cDeISa19_FW                                          | cDeISa19_RV  | TTHERM_00313180_DelCheck_FW                    | TTHERM_00313180_DelCheck_RV  |
| TTHERM_00460720        | Fig. 1; Table 1           | 3823                                      | 98721   | 99339   | cDeISa15_FW                                          | cDeISa15_RV  | TTHERM_00460720_DelCheck_FW1                   | TTHERM_00460720_DelCheck_RV  |
| TTHERM_00460720        | Table 1                   | 3823                                      | 98677   | 99568   | cDeISa15_FW                                          | cDeISa15_RV2 | TTHERM_00460720_DelCheck_FW2                   | TTHERM_00460720_DelCheck_RV  |
| TTHERM_00494510        | Fig. 1; Table 1           | 3711                                      | 398243  | 398863  | cDeISa12_FW                                          | cDeISa12_RV  | TTHERM_00494510_DelCheck_FW                    | TTHERM_00494510_DelCheck_RV  |
| TTHERM_00520940        | Fig. 1; Table 1           | 3717                                      | 18388   | 18869   | cDeISa13_FW                                          | cDeISa13_RV  | TTHERM_00520940_DelCheck_FW                    | TTHERM_00520940_DelCheck_RV  |
| TTHERM_00565620        | Fig. 1; Table 1           | 3721                                      | 288798  | 289473  | cDeISa6_FW                                           | cDeISa6_RV   | TTHERM_00565620_DelCheck_FW                    | TTHERM_00565620_DelCheck_RV  |
| TTHERM_00584620        | Fig. 1; Table 1           | 3675                                      | 48731   | 49313   | cDeISa5_FW                                           | cDeISa5_RV   | Sa5_DelCheck_FW                                | Sa5_DelCheck_RV              |
| TTHERM_00675560        | Fig. 1                    | 101                                       | 212542  | 213240  | cDeISa16_FW                                          | cDeISa16_RV  | TTHERM_00675560_DelCheck_FW                    | TTHERM_00675560_DelCheck_RV1 |
| TTHERM_00675560        | Table 1                   | 101                                       | 212542  | 213580  | cDeISa16_FW                                          | cDeISa16_RV2 | TTHERM_00675560_DelCheck_FW                    | Sa16_DelCheck_RV2            |
| TTHERM_00841280        | Fig. 1; Table 1           | 3741                                      | 38458   | 39065   | cDeISa18_FW                                          | cDeISa18_RV  | Sa18_DelCheck_FW                               | Sa18_DelCheck_RV             |
| TTHERM_01044400        | Fig. 1; Table 1           | 3760                                      | 14886   | 15592   | cDeISa11_FW                                          | cDeISa11_RV  | TTHERM_01044400_DelCheck_FW                    | TTHERM_01044400_DelCheck_RV1 |
| TTHERM_01344740        | Fig. 1; Table 1           | 336                                       | 36510   | 37116   | cDeISa10_FW                                          | cDeISa10_RV  | TTHERM_01344740_DelCheck_FW                    | TTHERM_01344740_DelCheck_RV  |
| TTHERM_00388160        | Fig. 1; Table 1           | 41                                        | 199509  | 200155  | Log1_cDeIFW                                          | Log1_cDeIRV  | Log1_DelCheckFW                                | Log1_DelCheckRV              |
| TTHERM_00408840        | Fig. 1; Table 1           | 3714                                      | 89022   | 89690   | Log2_cDeIFW                                          | Log2_cDeIRV  | Log2_DelCheckFW                                | Log2_DelCheckRV              |
| TTHERM_00935580        | Fig. 1; Table 1           | 169                                       | 58015   | 58654   | Sv1_cDeIFW                                           | Sv1_cDeIRV   | Sv1_DelCheckFW                                 | Sv1_DelCheckRV               |
| TW12                   | Fig. 4                    | scf_8254654                               | 64114   | 65135   | TW12_cDeIFW                                          | TW12_cDeIRV  | TW12_DelCheckFW2                               | TW12_DelCheckRV2             |
| TW12                   | Fig. 4                    | scf_8254654                               | 64114   | 65135   | TW12_cDeIFW                                          | TW12_cDeIRV  | TW16_DelCheckFW                                | TW16_DelCheckRV              |
| TW12                   | Fig. 4                    | scf_8254654                               | 64114   | 65135   | TW12_cDeIFW                                          | TW12_cDeIRV  | TW17_DelCheckFW2                               | TW17_DelCheckRV2             |
| XRN2                   | Fig. 5                    | 3702                                      | 598484  | 599481  | XRN2_cDeIFW                                          | XRN2_cDeIRV  | XRN2_DelCheck_FW                               | XRN2_DelCheck_RV             |
| XRN4                   | Fig. 5                    | 3813                                      | 329272  | 330354  | XRN4_cDeIFW_XRN2c                                    | XRN4_cDeIRV  | XRN4_DelCheck_FW                               | XRN4_DelCheck_RV             |
